# Supplementary material for: Aqueous up-conversion organic phosphorescence and tunable dual emission in a single-molecular emitter
Source: Royal Society of Chemistry journal article supplement (doi:10.1039/d4sc08330j), 2025-01-01
Supplement: d4sc08330j1.pdf [file d4sc08330j1.pdf]

## Supplementary information

### **Aqueous up-conversion organic phosphorescence and tunable dual emission in a single-molecular emitter**

Yang Li<sup>a,b</sup>, Zizhao Huang<sup>a</sup>, Aixing Shao<sup>a</sup>, Zhiqin Wu<sup>a</sup>, Zhenyi He<sup>a</sup>, He Tian<sup>a</sup>, and Xiang Ma<sup>a\*</sup>

<sup>a</sup>Key Laboratory for Advanced Materials and Joint International Research Laboratory of Precision Chemistry and Molecular Engineering, Frontiers Science Center for Materiobiology and Dynamic Chemistry, School of Chemistry and Molecular Engineering, East China University of Science and Technology, Shanghai 200237

<sup>b</sup>School of Chemical Engineering & Pharmacy, Pharmaceutical Research Institute, Hubei Key Laboratory of Novel Reactor and Green Chemical Technology, Wuhan Institute of Technology, Wuhan 430205

## Experimental section

**Instrumentation and methods.** All reagents and solvents were commercially available and used without further purification unless otherwise noted.  $^1\text{H}$  NMR and  $^{13}\text{C}$  NMR spectra were measured on a Bruker AV-400 spectrometer. The electronic spray ionization (ESI) high-resolution mass spectra were tested on a Waters LCT Premier XE spectrometer. The UV-Vis absorption spectra were obtained on a Shimadzu UV-2600 spectrophotometer. Fluorescence, phosphorescence, and lifetime of delayed emission spectra were recorded on an Agilent Cary Eclipse spectrophotometer. Phosphorescence mode; Delay time = 0.1 ms, Photoluminescence spectra were recorded on Shimadzu RF-6000 spectrometer. Fluorescence lifetimes were measured on Edinburgh Instruments Fluorescence Spectrometer (FLS1000). Absolute PL quantum yields were determined with a spectrometer C11347-11 (Hamamatsu, Japan). Leica TCS-SP8 fluorescence microscope equipped with an oil immersion objective (63 $\times$ ) was used for two-photon confocal imaging. The phosphorescence lifetime imaging microscope (PLIM) image setup was integrated with an Olympus IX81 laser scanning confocal microscope.

**Theoretical Calculation.** The Gaussian 09 software package was employed to perform Density Functional Theory (DFT) and Time-Dependent (TD) DFT calculations. The ground-state ( $S_0$ ) geometries were optimized using the B3LYP functional and 6-311G\* basis set. Subsequently, the energies in both singlet and triplet states were obtained by applying the time-dependent DFT method based on the optimized  $S_0$  molecular structure. Our theoretical calculations were carried out in water phase. The optimized recursive convolution algorithm (ORCA) software was utilized to compute the SOC values. This method has been seamlessly integrated into our computational protocol, allowing for the convenient extraction of SOC values following Gaussian calculations.

**Cell culture and cytotoxicity experiments.** The HeLa cells were cultured in Gulbecco's modified Eagle medium (DMEM) supplemented with 10% fetal bovine serum (FBS) and 1% penicillin/streptomycin. The incubation of HeLa cells was performed using DMEM medium containing 10% FBS and 1% penicillin/streptomycin,

under a humidified atmosphere with 5% CO<sub>2</sub> at 37°C. Subsequently, the cells were treated with different concentrations of guest and host-guest complexes **Y3** for a duration of 24 hours. The relative cellular viability was assessed using the MTT assay following the provided instructions.

**PLIM cell imaging.** The HeLa cells were cultured with **Y3** (50 μM) for 6 hours. Following incubation, the cells were washed three times with PBS (pH 7.4). Subsequently, phosphorescence cell images were acquired using PLIM through integration with an Olympus IX81 laser scanning confocal microscope. The confocal microscope system detected the phosphorescence signals, and data analysis was performed using professional software provided by PicoQuant Company. The PLIM data was processed in SymPhoTime 64 pro software (Pico Quant Company) and exported in ASCII format for line profiles or BMP format for images. Double exponential tailfit was applied to fit the PLIM data obtained from regions of interest sized at 256 × 256 pixels, with a binning factor of 1 in SymPhoTime 64 pro software.

**Cellular imaging at different temperatures.** The HeLa cells were meticulously washed with PBS and subsequently incubated with **Y3** (0.5 mg mL<sup>-1</sup>) at 37 °C for a duration of 30 minutes. Any extracellular **Y3** molecules were gently eliminated through PBS washing. Subsequently, the HeLa cells subjected to various incubation temperatures were analyzed using confocal imaging techniques. The temperature settings for all experiments were accurately calibrated using an infrared camera (Fotric).

#### **Calculation of the thermal sensitivity and uncertainty**

Thermal relative sensitivity ( $S_r$ ) of **Y3** is calculated by:

$$S_r = \frac{1}{R} \frac{dR}{dT}$$

where  $R$  is the intensity or lifetime ratio value of fluorescence and phosphorescence and  $T$  is the temperature.

## Synthesis and compound characterization

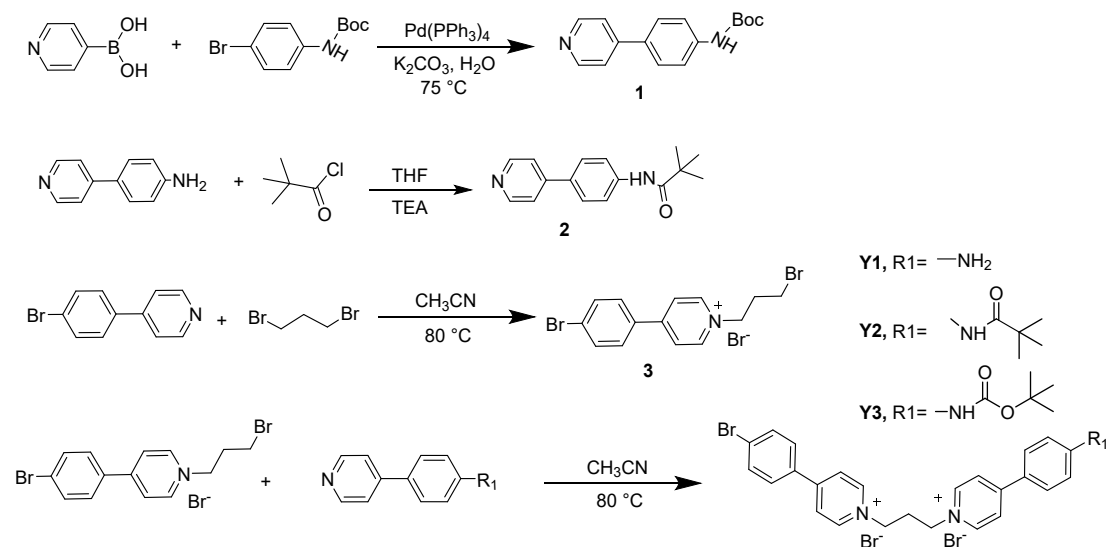

**Figure S1.** Synthetic routes of guest molecule **Y<sub>n</sub>** (n=1-3).

**Synthesis of compound 1.** The tert-butyl (4-bromophenyl)carbamate (0.81 g, 3 mmol), 4-pyridineboronic acid (0.41 g, 3.3 mmol), and  $\text{K}_2\text{CO}_3$  (0.62 g, 4.5 mmol) were dissolved in anhydrous THF (30 mL) and degassed for 30 minutes prior to the addition of  $\text{Pd}(\text{PPh}_3)_4$  (0.19 g, 0.16 mmol). After rapid addition of  $\text{Pd}(\text{PPh}_3)_4$ , the solution was further degassed for an additional 15 minutes before being heated at 75 °C under an argon atmosphere for a duration of 8 hours. Following the reaction, the crude product was transferred into water (50 mL) and subjected to three extractions with dichloromethane using portions of 20 mL each time. The organic layer was then dried over anhydrous  $\text{Na}_2\text{SO}_4$ , filtered, and concentrated by rotary evaporation. Finally, purification of the resulting residue was achieved through silica gel chromatography employing a dichloromethane: ethyl acetate eluent mixture in a ratio of 5:1 (v/v), yielding Compound **1** as a white solid.  $^1\text{H}$  NMR (400 MHz, Chloroform-*d*)  $\delta$  8.63 (d,  $J$  = 6.2 Hz, 2H), 7.60 (d,  $J$  = 8.7 Hz, 2H), 7.49 (m, 4H), 1.54 (s, 9H).  $^{13}\text{C}$  NMR (151 MHz,  $\text{CDCl}_3$ )  $\delta$  152.57, 150.22, 147.67, 139.49, 132.41, 127.61, 121.12, 118.80, 80.95, 28.34.

**Synthesis of compound 2.** The dehydrated solution of pivaloyl chloride (0.31 g, 2.6

mmol) in THF (20 mL) was slowly added to a mixture of 4-(pyridin-4-yl)aniline (0.51 g, 3 mmol) and triethylamine (2.0 mL) in THF (20 mL), under an ice bath, followed by stirring at room temperature for 5 hours. Upon completion of the reaction, the THF solvent was evaporated and dichloromethane (300 mL) was added to the residue, which was then washed with water and saturated brine before being dried with Na<sub>2</sub>SO<sub>4</sub> and concentrated. The resulting crude product was purified using silica gel column chromatography with dichloromethane/ethyl acetate (5/1) as the eluent to yield a white solid product (0.46 g, 60%). <sup>1</sup>H NMR (400 MHz, Chloroform-*d*) δ 8.64 (m, 2H), 7.68 (d, *J* = 8.8 Hz, 2H), 7.62 (d, *J* = 8.7 Hz, 2H), 7.49 (m, 2H), 1.35 (s, 9H). <sup>13</sup>C NMR (151 MHz, CDCl<sub>3</sub>) δ 176.77, 150.25, 147.57, 139.06, 133.62, 127.56, 121.23, 120.33, 39.76, 27.63.

**Synthesis of compound 3.** The synthesis of Compound **3** was conducted according to the procedure outlined in the referenced literature<sup>1</sup>. A solution containing 4-(4-bromophenyl)pyridine (100 mg, 0.43 mmol) and 1,3-dibromopropane (0.35 g, 1.74 mmol) in CH<sub>3</sub>CN (25 mL) was subjected to heating at a temperature of 60 °C for a duration of 12 hours. Upon cooling to room temperature, the resulting reaction mixture was dispersed in diethyl ether (200 mL). Subsequently, the mixture underwent filtration and the solid product obtained was washed with acetone. Finally, a white solid product with a yield of 108 mg (60%) was obtained.

**Synthesis of compound Y1.** The synthesis of compound **Y1** yielded a yellow powder with 33% efficiency (39 mg), utilizing 4-(pyridin-4-yl)aniline (34 mg, 0.2 mmol) and compound **3** (95 mg, 0.22 mmol) as starting materials. <sup>1</sup>H NMR (400 MHz, Deuterium Oxide) δ 8.65 (d, *J* = 6.8 Hz, 2H), 8.38 (d, *J* = 6.9 Hz, 2H), 8.06 (d, *J* = 6.8 Hz, 2H), 7.85 (d, *J* = 7.0 Hz, 2H), 7.56 (d, *J* = 8.7 Hz, 2H), 7.50 (m, 4H), 6.64 (d, *J* = 8.7 Hz, 2H), 4.63 (t, *J* = 6.6 Hz, 4H), 2.77 (t, *J* = 6.5 Hz, 2H). <sup>13</sup>C NMR (151 MHz, CD<sub>3</sub>OD) δ 157.09, 155.86, 144.91, 144.88, 144.84, 144.68, 144.62, 133.77, 132.86, 132.82, 132.22, 132.20, 129.66, 129.61, 129.59, 129.55, 129.53, 129.51, 127.86, 127.04, 124.97, 124.93, 124.90, 124.88, 124.85, 57.22, 57.10, 32.05. HRMS (ESI) *m/z* for C<sub>25</sub>H<sub>24</sub>BrN<sub>3</sub> calcd. [M-2Br]<sup>2+</sup> 222.5579, found: 222.5571.

**Synthesis of compound Y2.** The synthesis of compound **Y2** yielded a white powder

with 34% efficiency (47 mg), utilizing compound **2** (50.8 mg, 0.2 mmol) and compound **3** (95 mg, 0.22 mmol) as starting materials.  $^1\text{H}$  NMR (400 MHz, Deuterium Oxide)  $\delta$  8.65 (d,  $J = 6.8$  Hz, 2H), 8.60 (d,  $J = 6.7$  Hz, 2H), 8.03 (dd,  $J = 9.3, 6.9$  Hz, 4H), 7.60 (d,  $J = 8.7$  Hz, 2H), 7.47 (d,  $J = 1.3$  Hz, 4H), 7.42 (d,  $J = 8.8$  Hz, 2H), 4.76 (s, 4H), 2.81 (m, 2H), 1.19 (s, 9H).  $^{13}\text{C}$  NMR (151 MHz,  $\text{CD}_3\text{OD}$ )  $\delta$  178.75, 155.85, 144.83, 144.38, 143.34, 132.81, 129.58, 129.55, 128.59, 128.24, 127.05, 124.92, 123.92, 123.89, 121.05, 57.27, 56.88, 39.51, 31.97, 26.22. HRMS (ESI)  $m/z$  for  $\text{C}_{30}\text{H}_{32}\text{BrN}_3\text{O}$  calcd.  $[\text{M}-2\text{Br}]^{2+}$  242.5866, found: 264.5859.

**Synthesis of compound Y3.** The mixture of Compound **1** (54 mg, 0.2 mmol) and Compound **3** (95 mg, 0.22 mmol) was dissolved in 5 mL of  $\text{CH}_3\text{CN}$  and subjected to heating at a temperature of 80 °C for a duration of 12 hours. Subsequently, the resulting residue was cooled to room temperature and evaporated to remove the solvent. The crude product underwent recrystallization using a combination of  $\text{CH}_3\text{CN}$  and ethyl acetate, resulting in the formation of a white powder with an overall yield of 38% (51 mg).  $^1\text{H}$  NMR (400 MHz, Deuterium Oxide)  $\delta$  8.64 (d,  $J = 6.8$  Hz, 2H), 8.55 (d,  $J = 6.7$  Hz, 2H), 8.00 (d,  $J = 6.6$  Hz, 2H), 7.94 (d,  $J = 6.7$  Hz, 2H), 7.54 (d,  $J = 8.8$  Hz, 2H), 7.43 (q,  $J = 8.7$  Hz, 4H), 7.24 (d,  $J = 8.7$  Hz, 2H), 4.77 (m, 4H), 2.84 (m, 2H), 1.42 (s, 9H).  $^{13}\text{C}$  NMR (151 MHz,  $\text{CD}_3\text{OD}$ )  $\delta$  156.14, 155.81, 153.19, 144.89, 144.84, 144.32, 144.23, 132.88, 132.80, 129.59, 129.56, 129.54, 128.85, 128.81, 127.02, 126.54, 124.92, 124.82, 123.50, 123.47, 118.53, 118.49, 80.24, 57.28, 56.76, 31.97, 27.20. HRMS (ESI)  $m/z$  for  $\text{C}_{30}\text{H}_{32}\text{Br}_3\text{N}_3\text{O}_2$  calcd.  $[\text{M}-2\text{Br}]^{2+}$  272.5838, found: 272.5828.

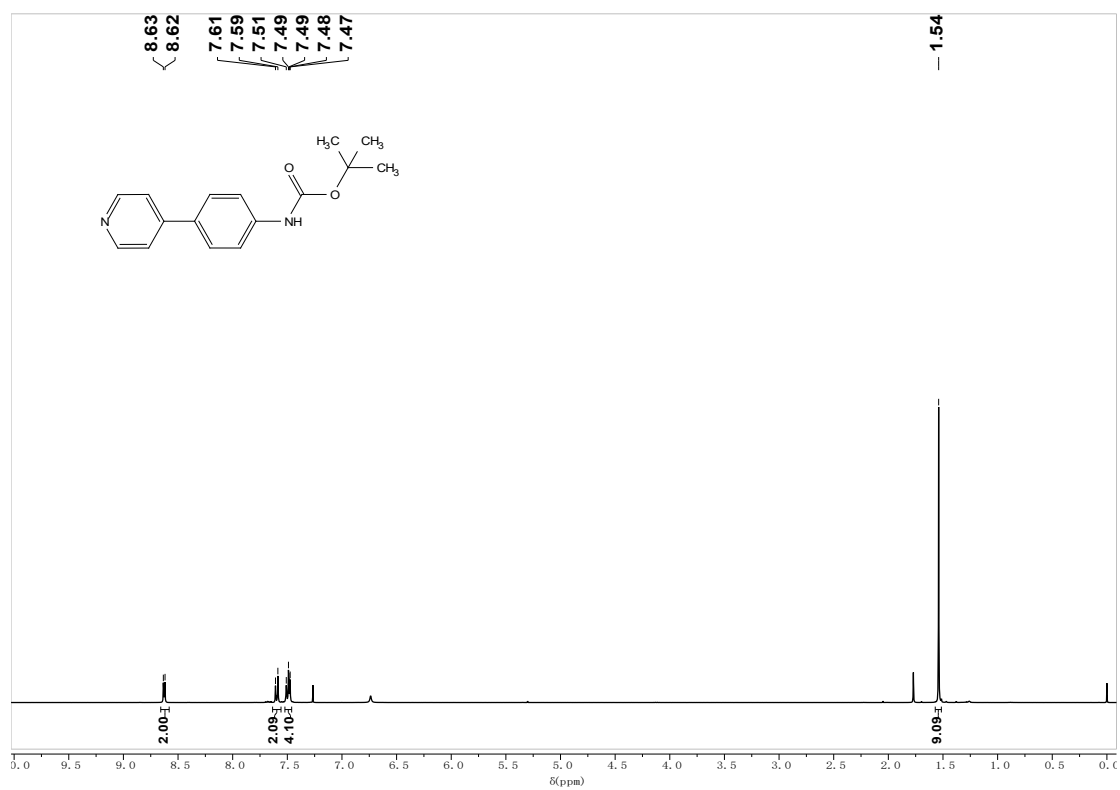

**Figure S2.** <sup>1</sup>H NMR spectrum of compound 1 in CDCl<sub>3</sub>.

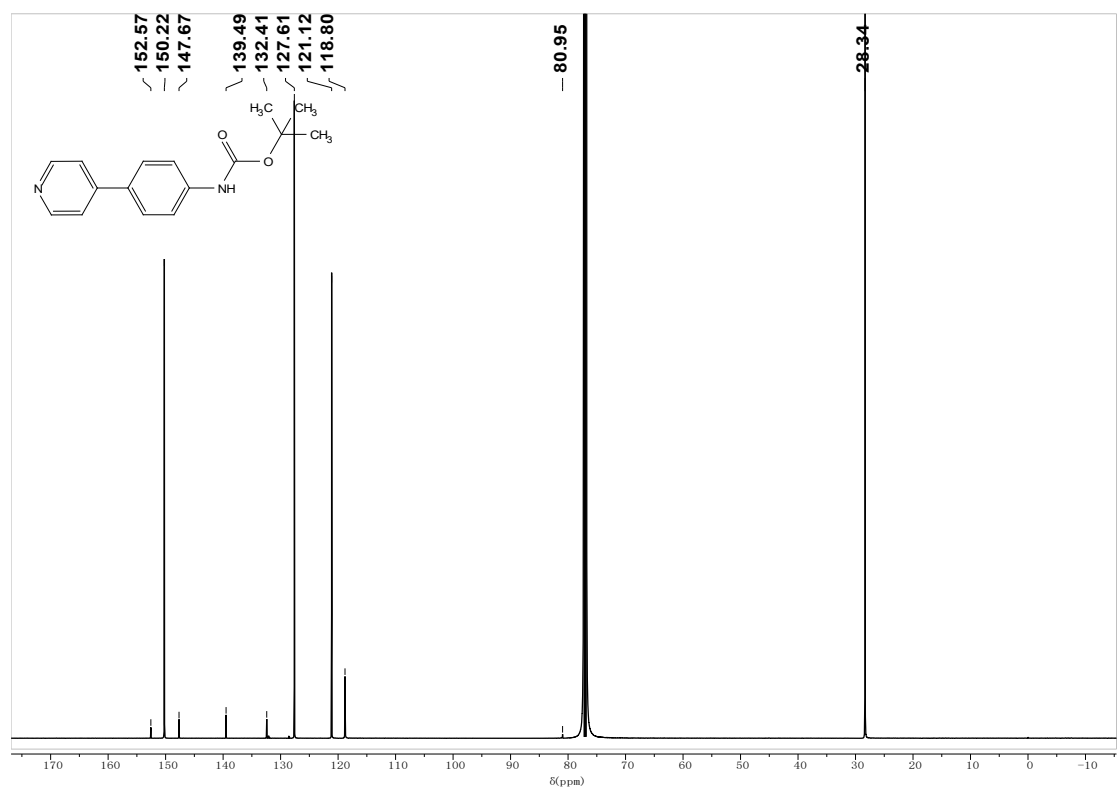

**Figure S3.** <sup>13</sup>C NMR spectrum of compound 1 in CDCl<sub>3</sub>.

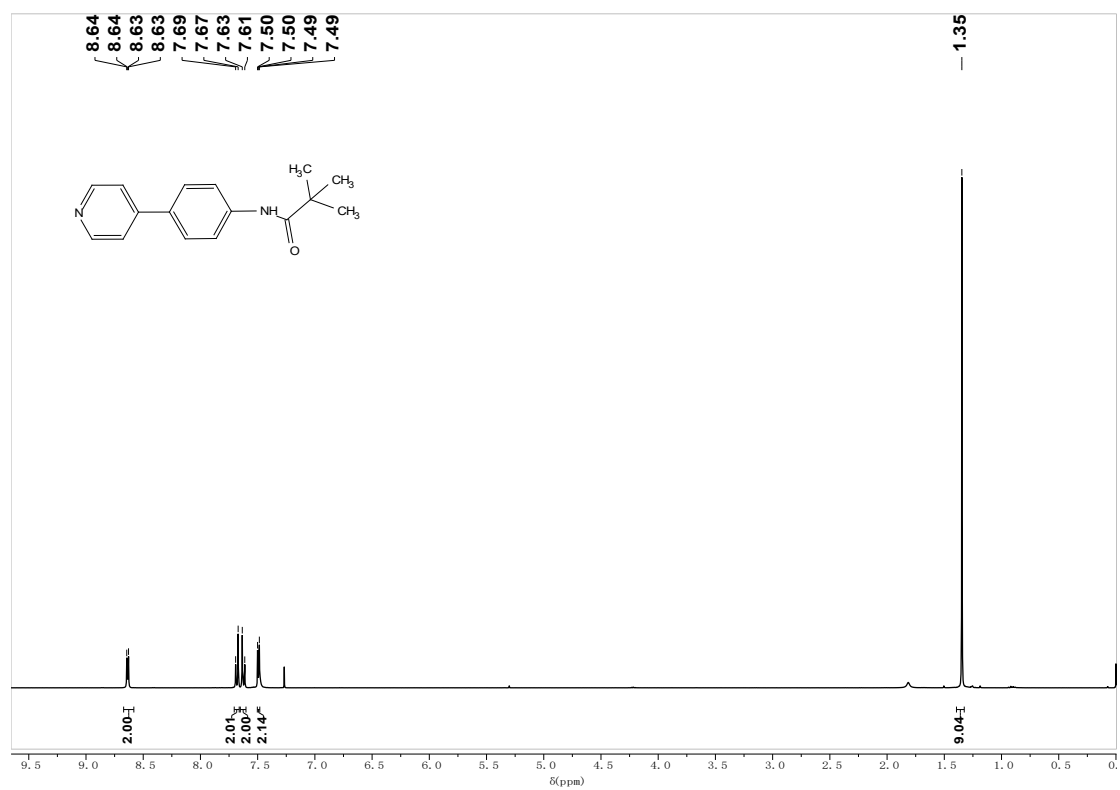

**Figure S4.**  $^1\text{H}$  NMR spectrum of compound **2** in  $\text{CDCl}_3$ .

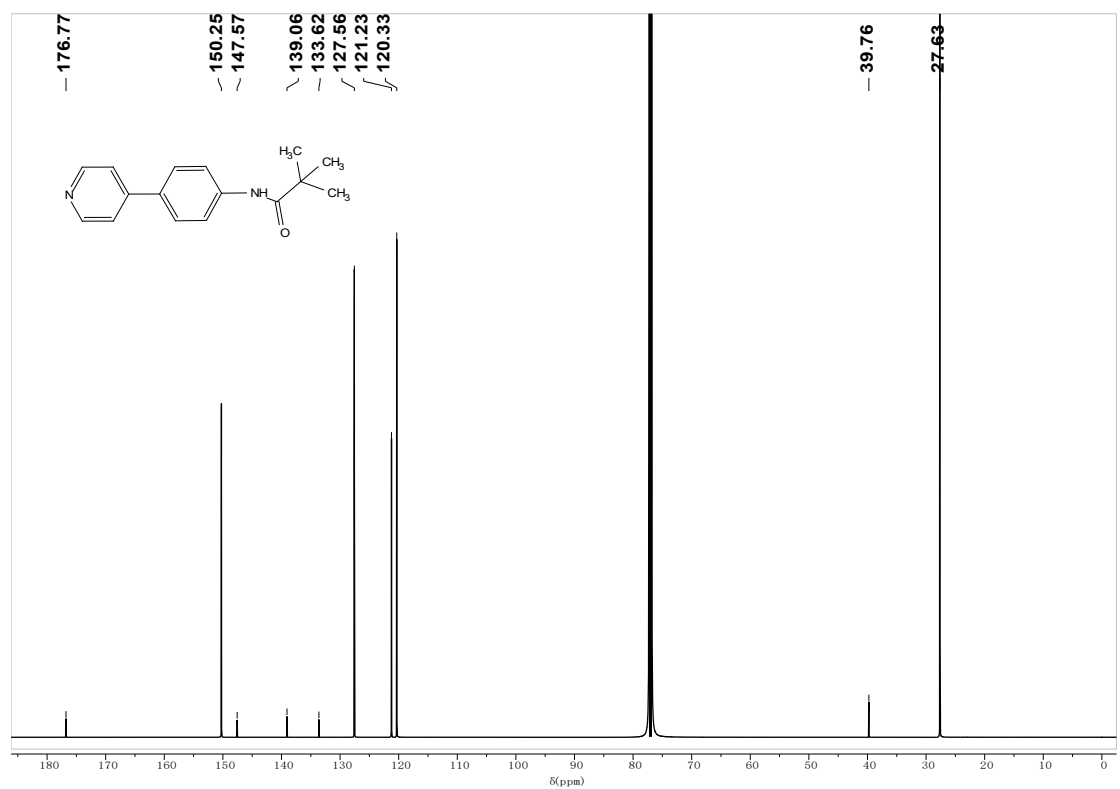

**Figure S5.**  $^{13}\text{C}$  NMR spectrum of compound **2** in  $\text{CDCl}_3$ .



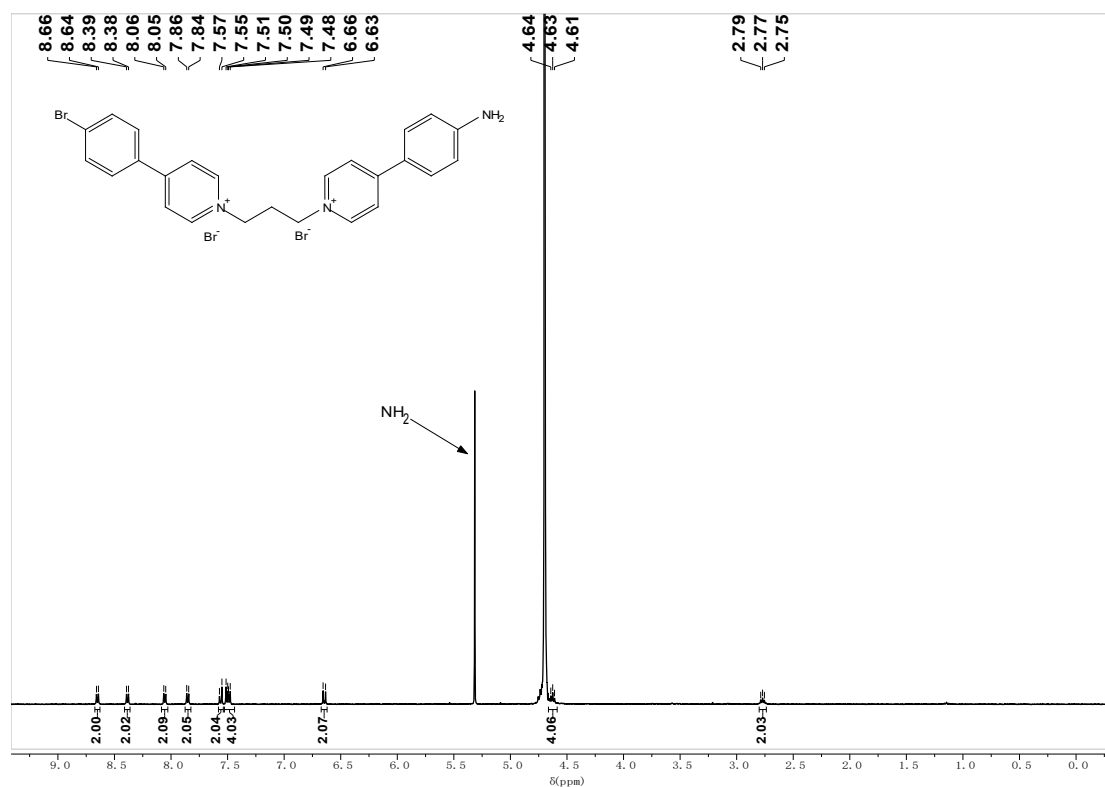

Figure S6.  $^1\text{H}$  NMR spectrum of compound Y1 in  $\text{D}_2\text{O}$ .

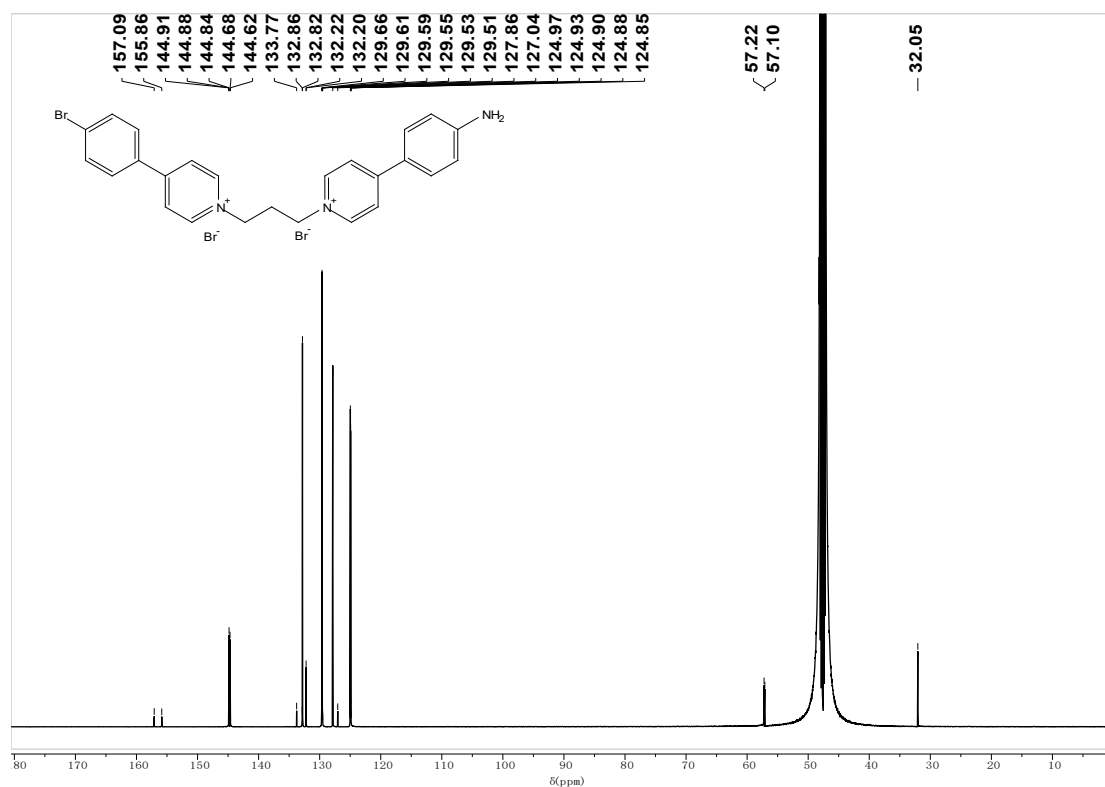

Figure S7.  $^{13}\text{C}$  NMR spectrum of compound Y1 in  $\text{CD}_3\text{OD}$ .

MX-LY-03 #66-72 RT: 0.15-0.16 AV: 7 NL: 1.99E9  
 T: FTMS + p ESI Full ms [100.0000-1500.0000]

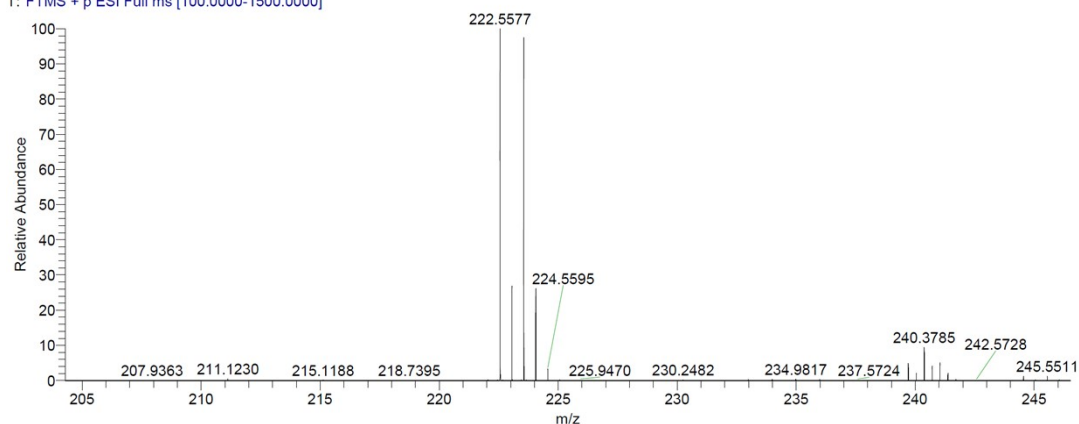

MX-LY-03#49-80 RT: 0.11-0.18 AV: 32  
 T: FTMS + p ESI Full ms [100.0000-1500.0000]  
 m/z = 222.13-222.71

| m/z      | Intensity   | Relative | Theo. Mass | Delta (ppm) | Composition                                       |
|----------|-------------|----------|------------|-------------|---------------------------------------------------|
| 222.5576 | 717601664.0 | 100.00   | 222.5571   | 0.44        | C <sub>25</sub> H <sub>24</sub> N <sub>3</sub> Br |

**Figure S8.** HRMS spectrum of compound Y1.

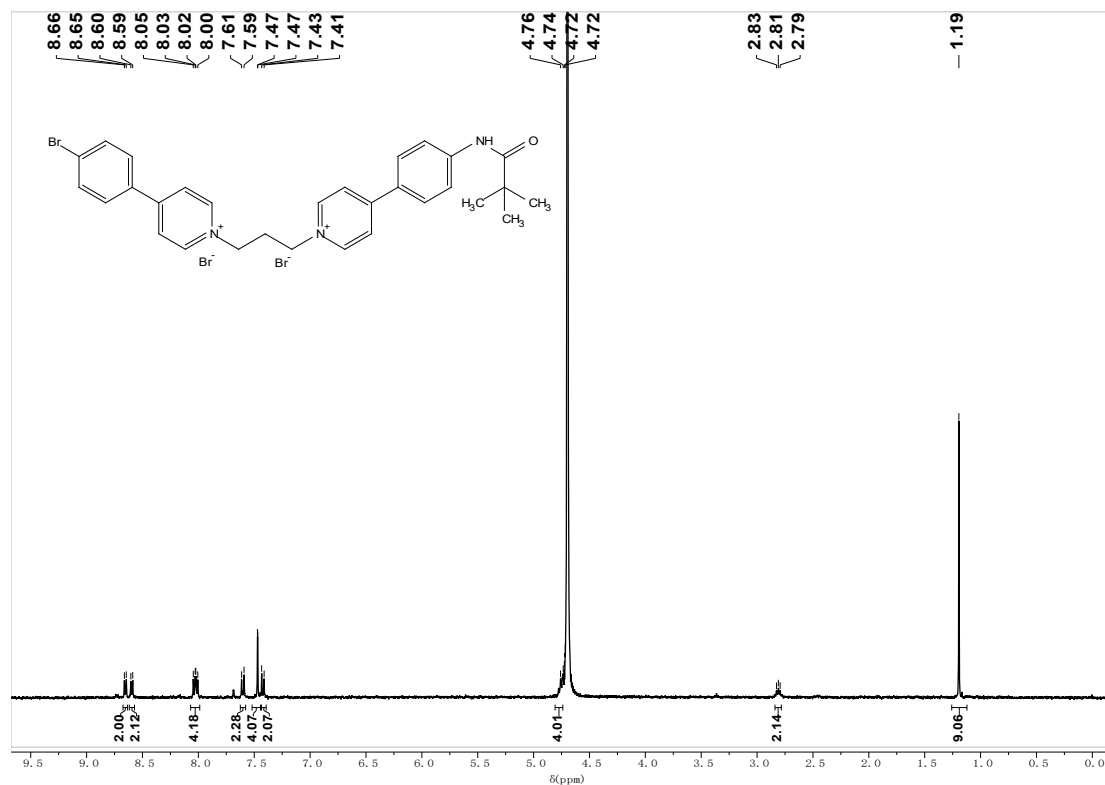

**Figure S9.** <sup>1</sup>H NMR spectrum of compound Y2 in D<sub>2</sub>O.

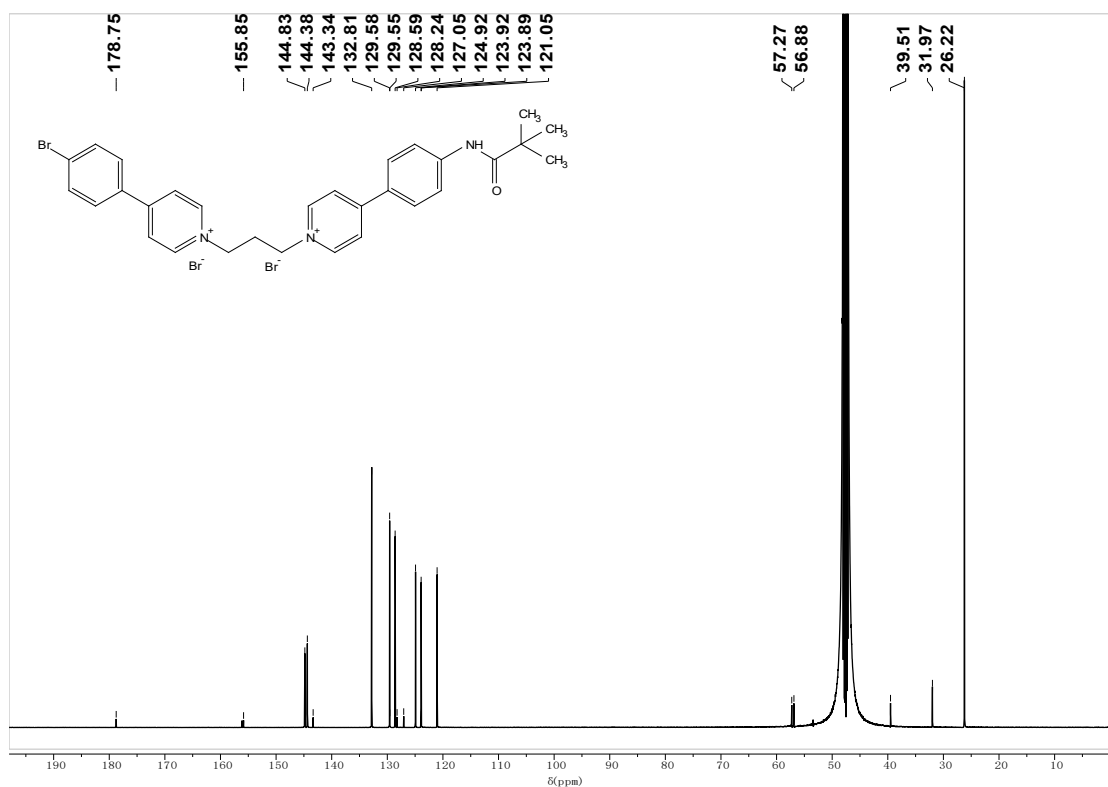

**Figure S10.**  $^{13}\text{C}$  NMR spectrum of compound Y2 in  $\text{CD}_3\text{OD}$ .

MX-LY-02 #8-82 RT: 0.02-0.18 AV: 75 NL: 2.38E9  
T: FTMS + p ESI Full ms [100.0000-1500.0000]

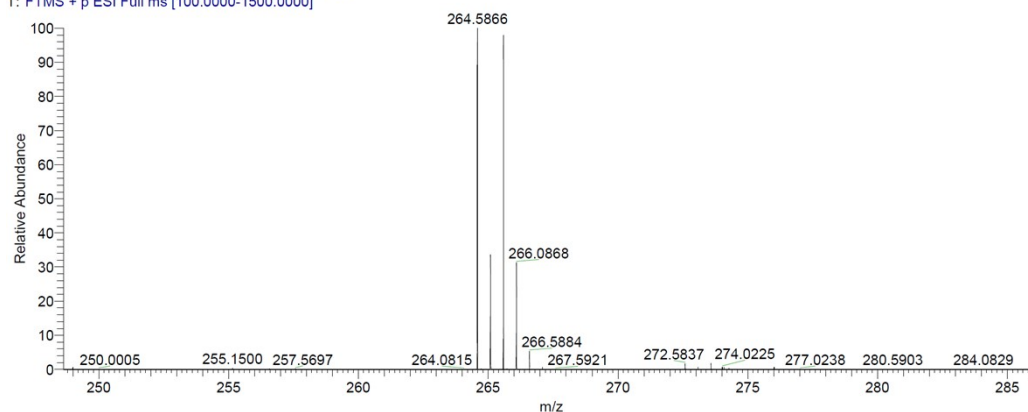

MX-LY-02#49-80 RT: 0.11-0.18 AV: 32  
T: FTMS + p ESI Full ms [100.0000-1500.0000]  
m/z = 264.33-264.76

| m/z      | Intensity    | Relative | Theo. Mass | Delta (ppm) | Composition                                               |
|----------|--------------|----------|------------|-------------|-----------------------------------------------------------|
| 264.5866 | 2541030912.0 | 100.00   | 264.5859   | 0.73        | $\text{C}_{30}\text{H}_{32}\text{O}_3\text{N}_3\text{Br}$ |

**Figure S11.** HRMS spectrum of compound Y2.

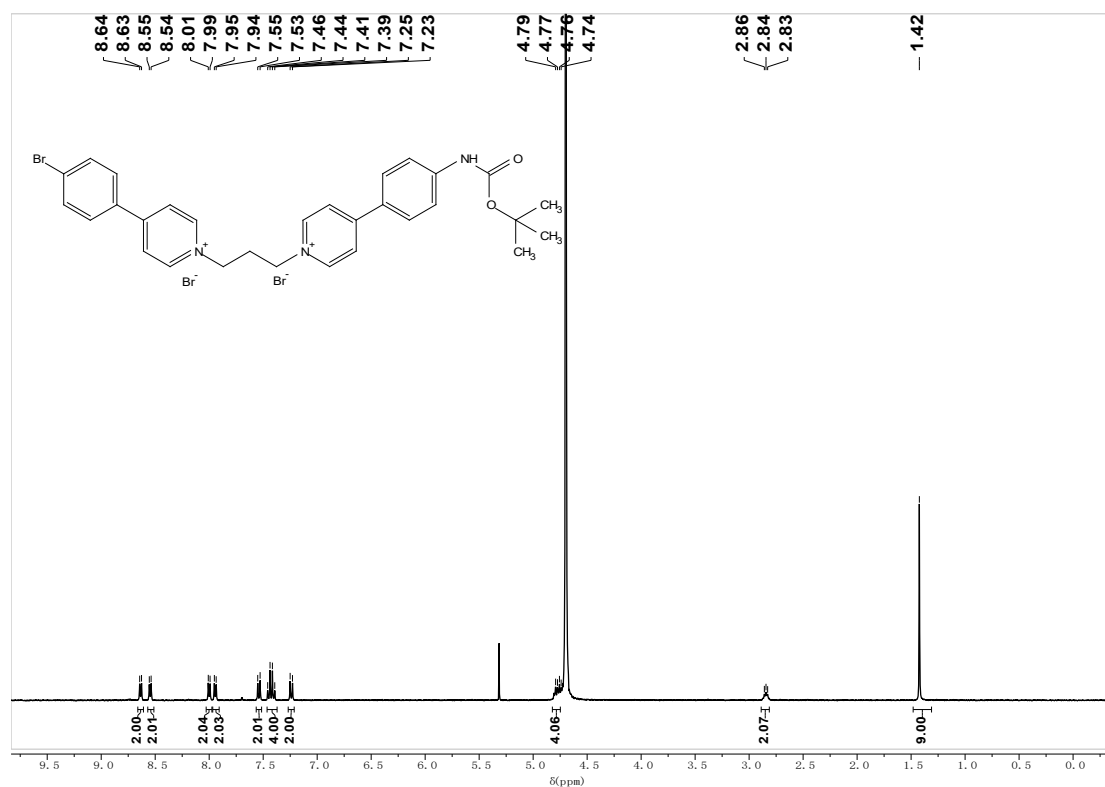

Figure S12.  $^1\text{H}$  NMR spectrum of compound Y3 in  $\text{D}_2\text{O}$ .

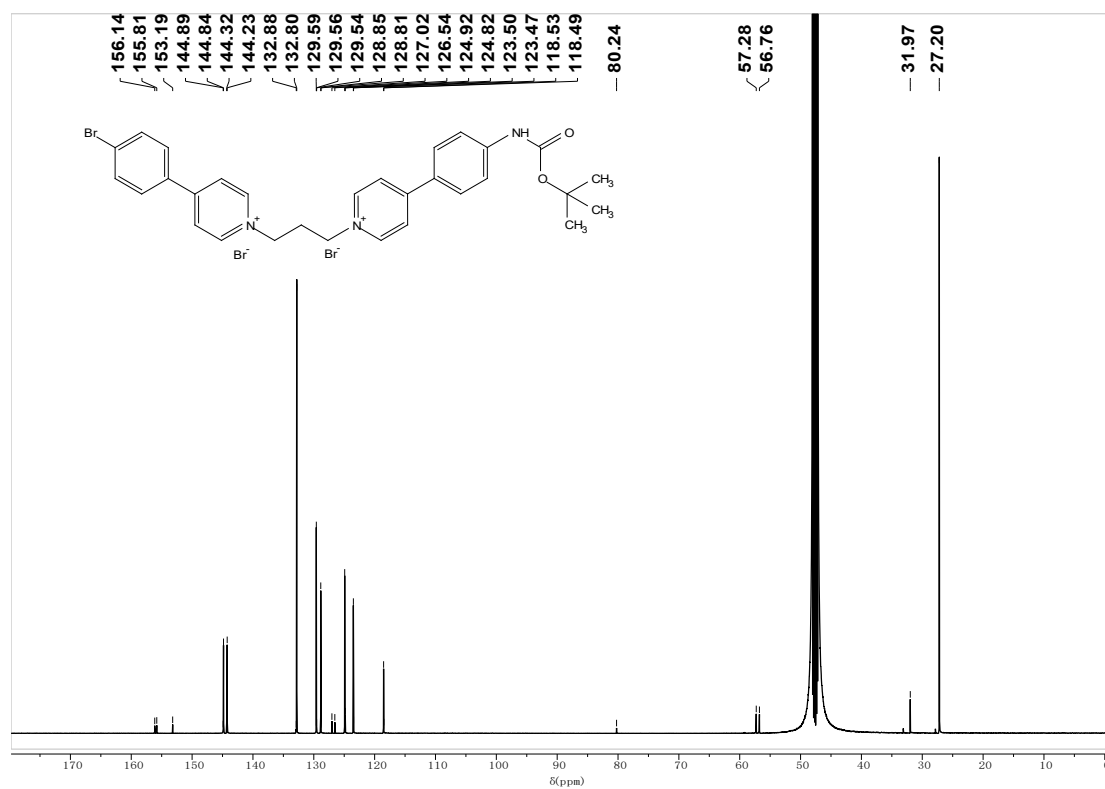

Figure S13.  $^{13}\text{C}$  NMR spectrum of compound Y3 in  $\text{CD}_3\text{OD}$ .

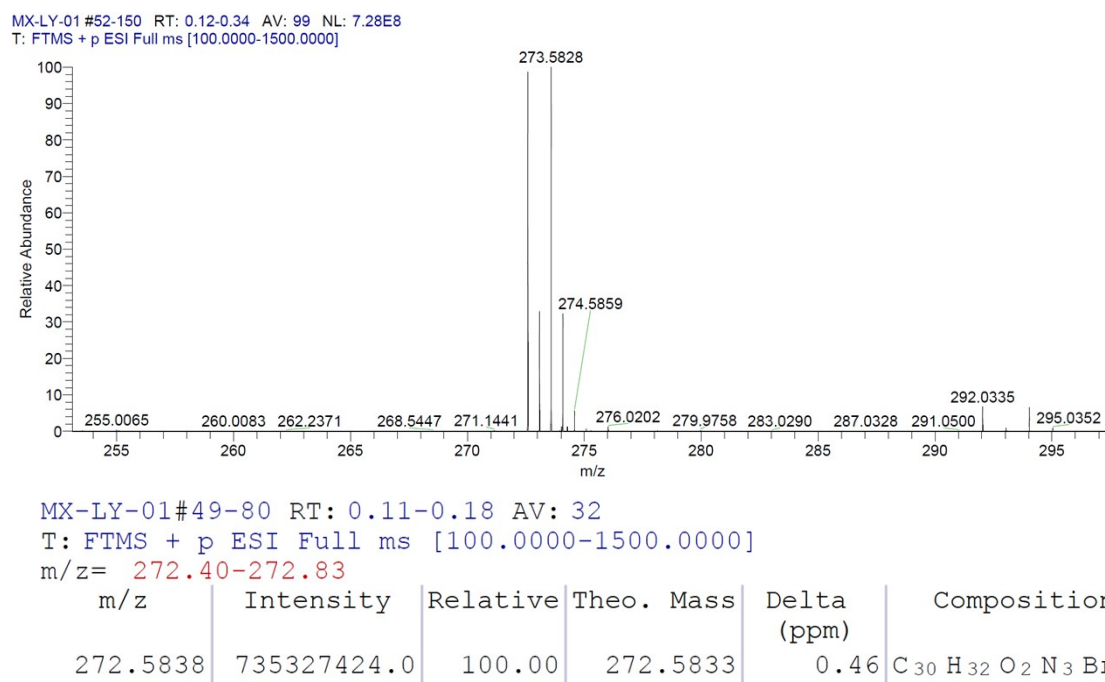

**Figure S14.** HRMS spectrum of compound **Y3**.

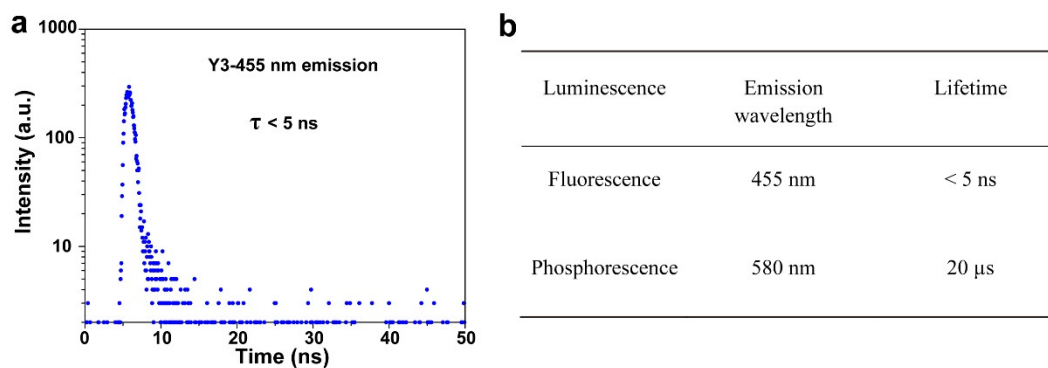

**Figure S15.** (a) Lifetime of **Y3** at 455 nm in aqueous solution at room temperature. (b) A comprehensive summary of the fluorescence and phosphorescence emission characteristics along with the lifetime properties of **Y3** molecule.

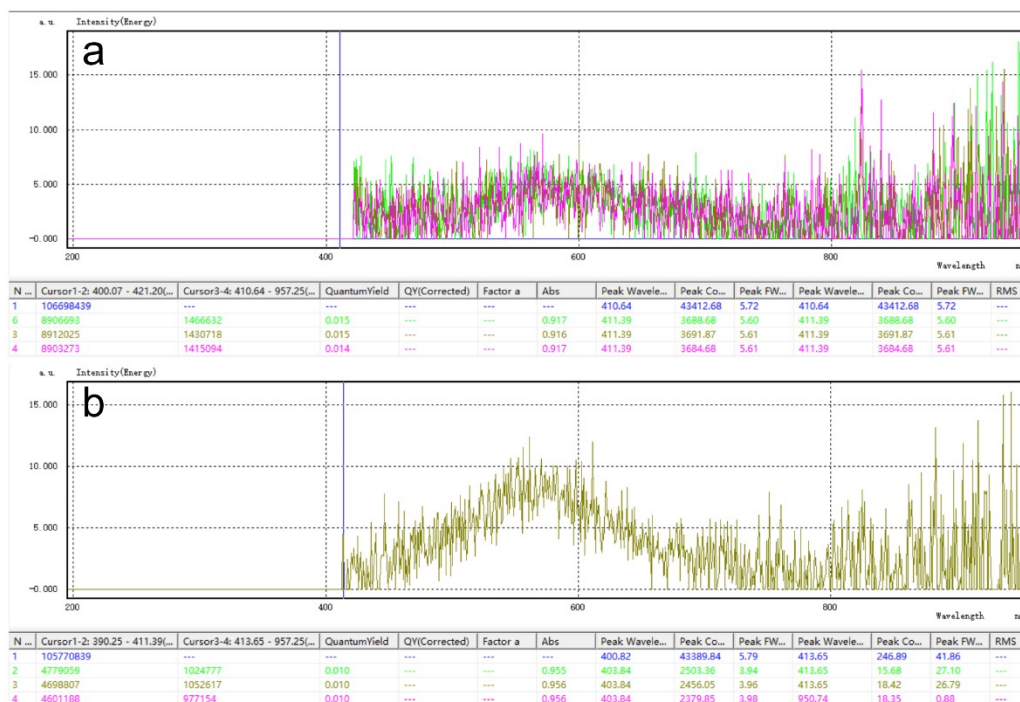

**Figure S16.** The absolute quantum yield measurement of (a) Y3 and (b) Y2 molecule (0.1 mM) in water at room temperature.

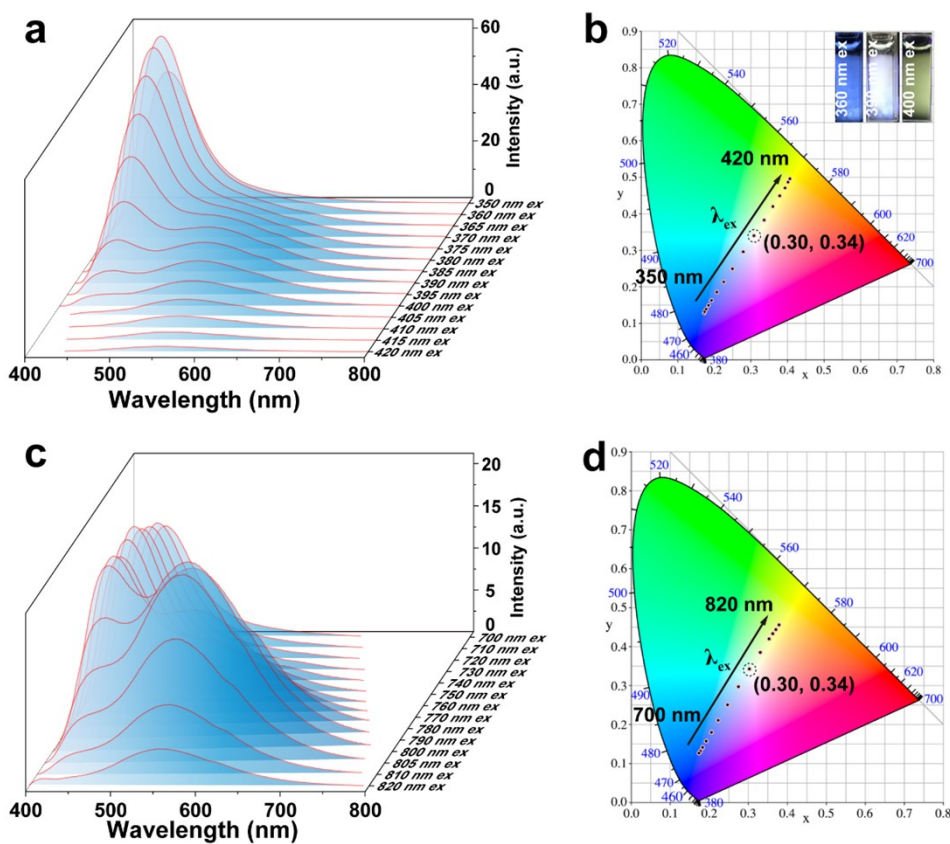

**Figure S17.** (a) PL spectra of Y2 ( $1 \times 10^{-4}$  M, excited by 350 nm to 420 nm) at aqueous solutions. (b) Chromaticity coordinate (CIE) of Y2 with varying excitation wavelength

in aqueous solution in accordance with (a). Inset images: The luminescent color of the **Y2** molecule upon excitation at wavelengths of 360 nm, 390 nm, and 400nm, respectively. (c) PL spectra of **Y2** ( $1 \times 10^{-4}$  M, excited by 700 nm to 820 nm). (d) CIE of **Y2** with varying NIR excitation wavelength in accordance with (c).

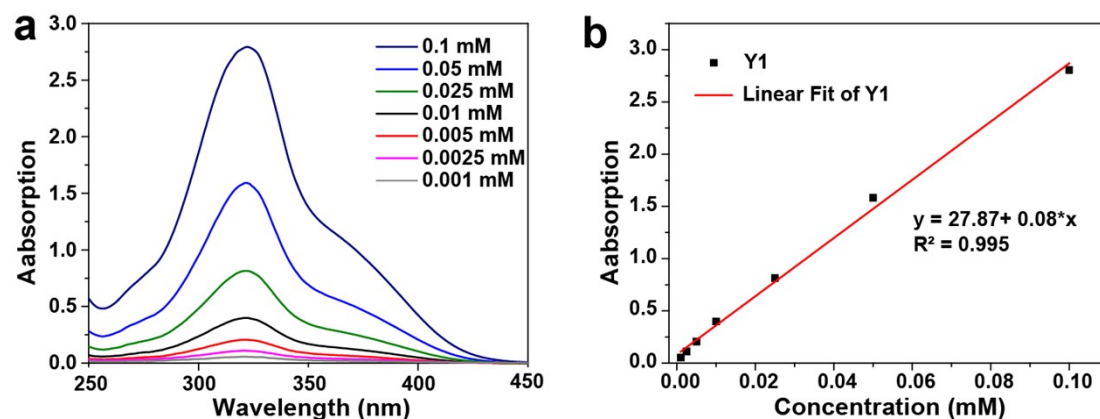

**Figure S18.** Absorption spectra of **Y3** aqueous solutions at various concentration respectively range from (a) 1.0  $\mu$ M to 0.1 mM (1-mm optical length), 25  $^{\circ}$ C. (b) absorption intensities at 323 nm wavelength of **Y3** aqueous solutions at various concentrations respectively corresponding to (a).

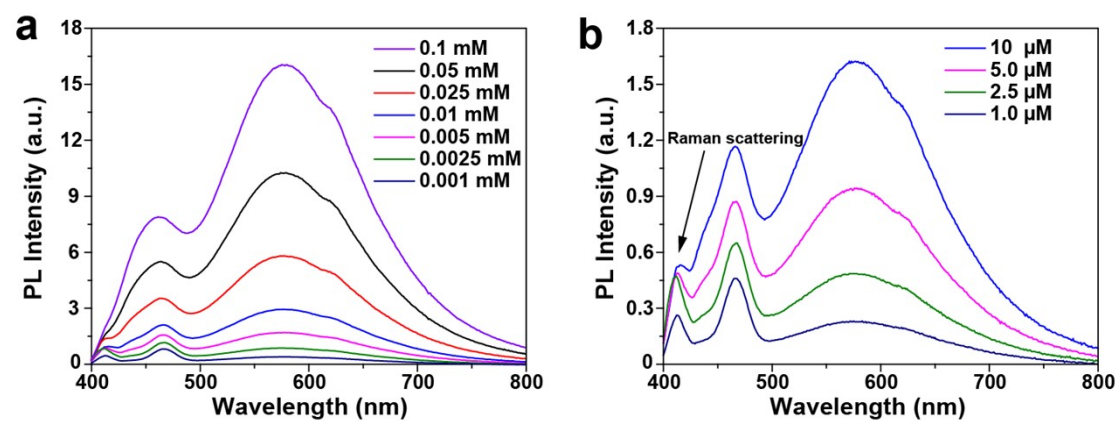

**Figure S19.** (a) PL spectra of aqueous **Y3** solutions at various concentrations (from 1  $\mu$ M~0.1 mM). (b) Partial magnification of PL spectra at extremely diluted concentration (from 1~10  $\mu$ M). Excitation wavelength 400 nm, 25  $^{\circ}$ C.

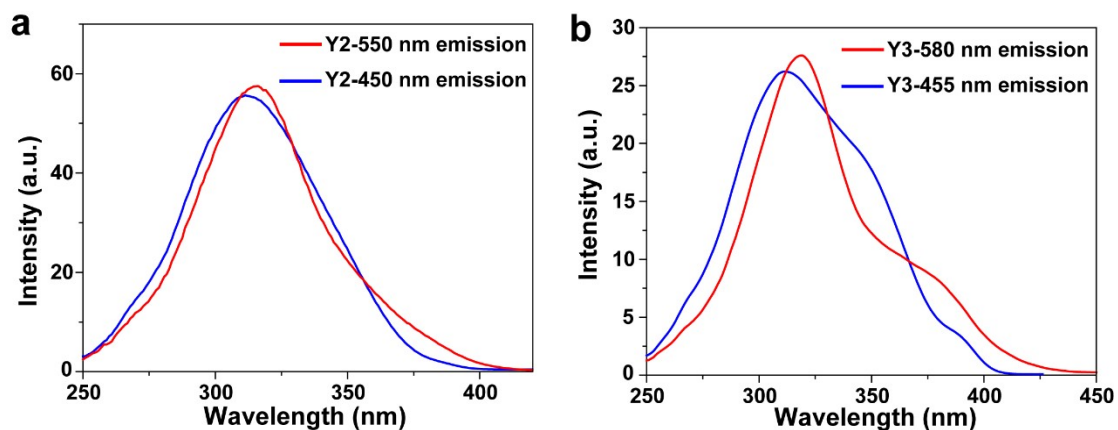

**Figure S20.** Excitation spectra of (a) Y2 ( $1 \times 10^{-4}$  M) at 550 nm and 450 nm, (b) Y3 ( $1 \times 10^{-4}$  M) at 580 nm and 455 nm in aqueous solution at room temperature.

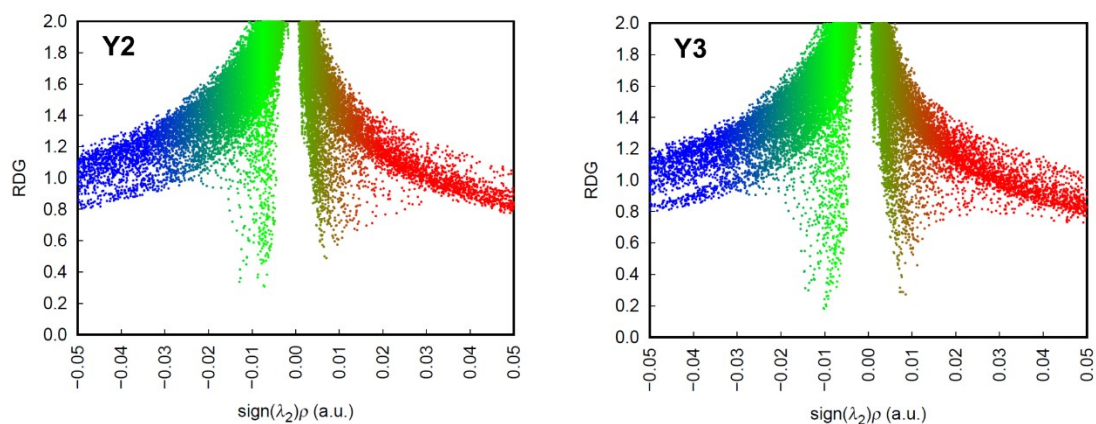

**Figure S21.** Plots of reduced density gradient vs the electron density ( $\rho$ ) multiplied by the sign of the second Hessian eigenvalue ( $\lambda_2$ ).



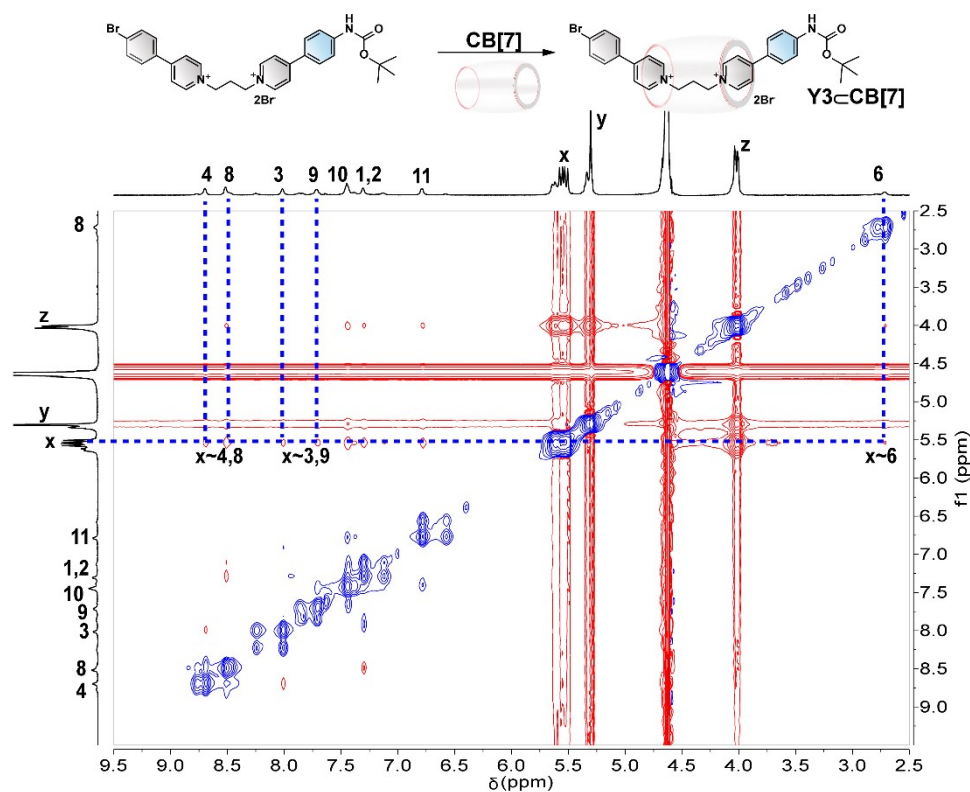

**Figure S22.** Partial 2D ROESY NMR spectrum of the complex  $Y3 \subset CB[7]$  ( $[Y3] = [CB[7]] = 1 \text{ mM}$ , in  $D_2O$  at 298 K).

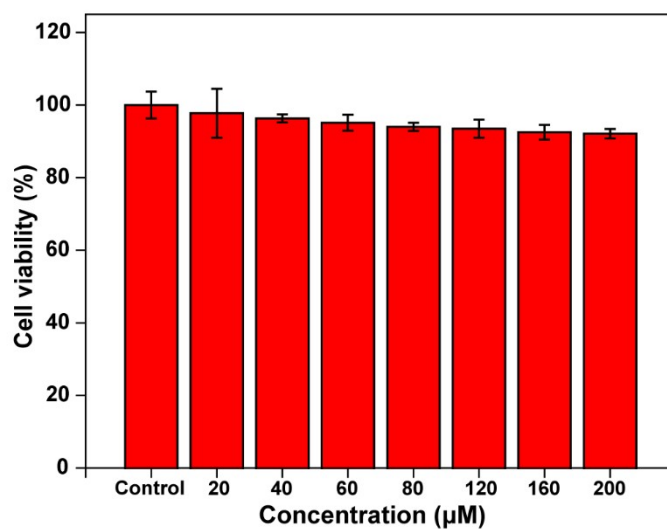

**Figure S23.** Cell toxicity of  $Y3$  towards HeLa cells with an incubation time of 24 h. Error bar represents s.d.

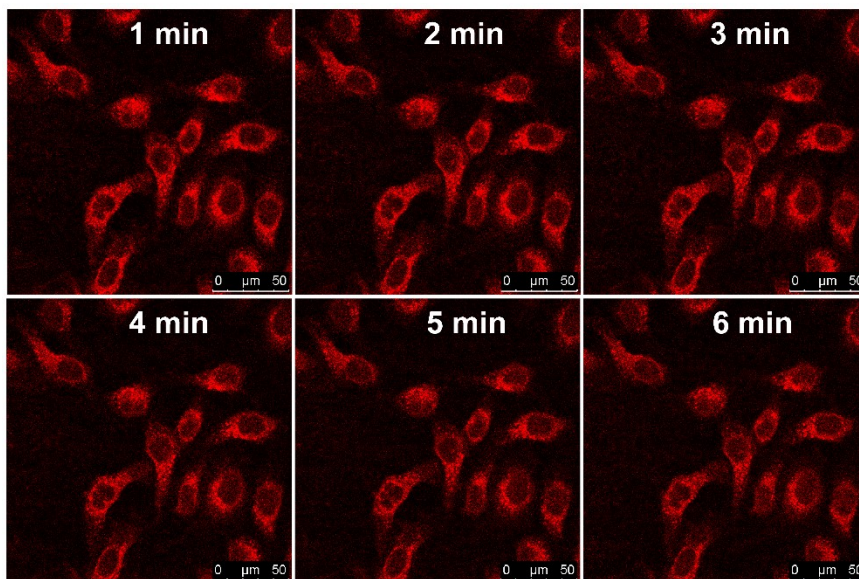

**Figure S24.** Intracellular photobleaching of RTP probe **Y3** at 405 nm laser (intensity 30 %) in HeLa cells. Phosphorescence images of HeLa cells stained with 100  $\mu\text{M}$  **Y3** were captured after every 1 min irradiation.

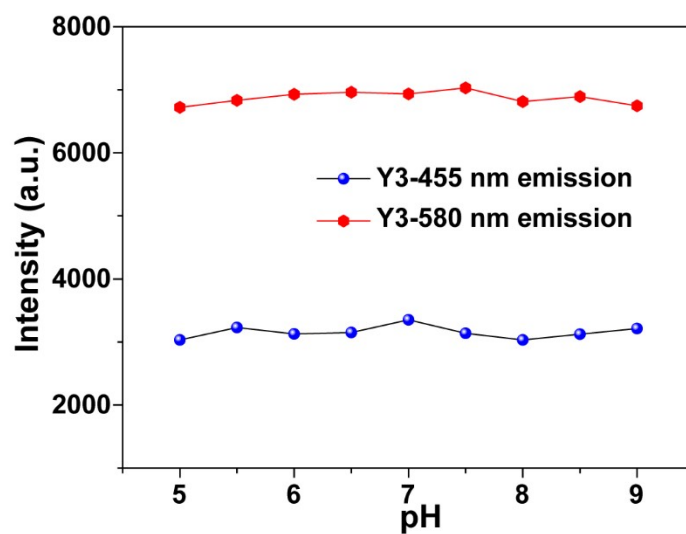

**Figure S25.** Fluorescence spectra of **Y3** ( $5 \times 10^{-5}$  M) in PBS buffer (10 mM) at various pH's.  $\lambda_{\text{ex}} = 405$  nm.

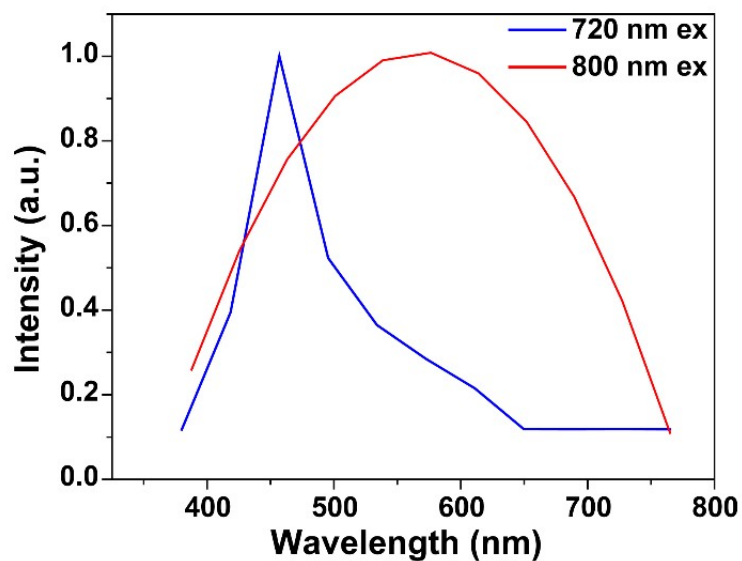

**Figure S26.** Emission spectra of Y3 molecule at different excitation intensities (mW) by an 800 nm and 700 nm femtosecond pulsed laser light.

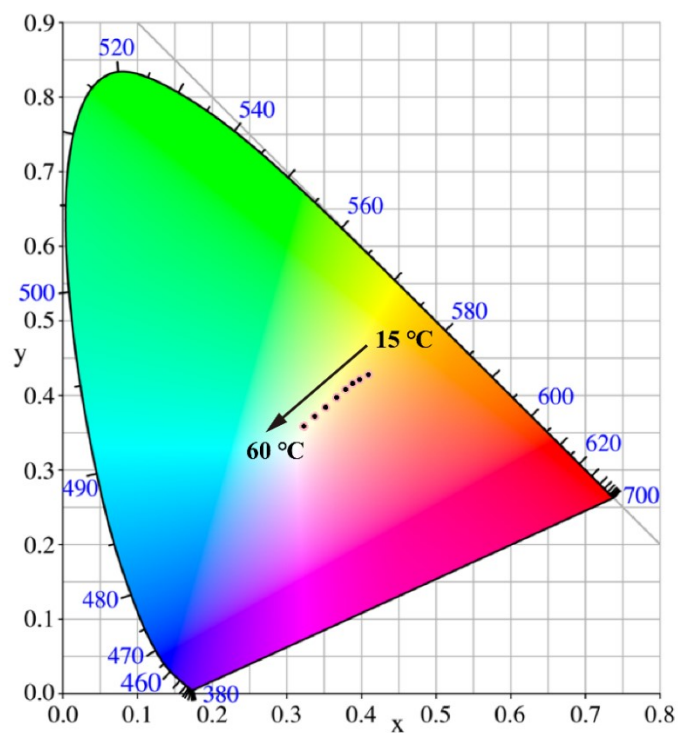

**Figure S27.** CIE of Y3 with varying temperature (15 °C to 60 °C) in aqueous solution in accordance with Figure 7a.

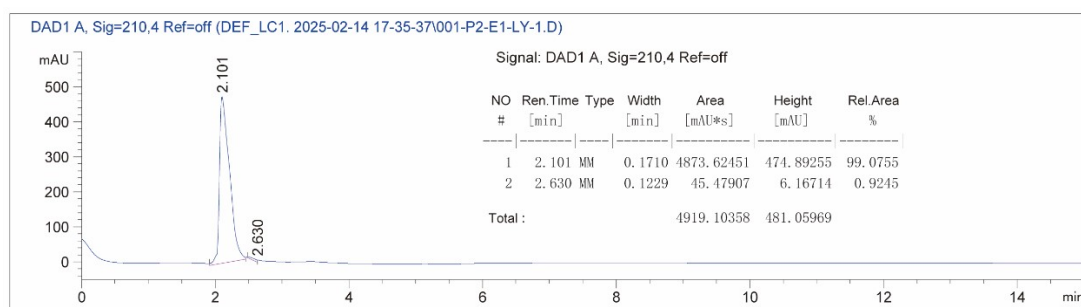

**Figure S28.** HPLC Spectra of the Y3 Molecule. High Performance Liquid Chromatography (HPLC) Conditions: Column: Agilent Inert Sustain C18 (150 mm×4.6 mm×5 μm); Detection: 210 nm; Flow rate: 1 mL/min; Temperature: 35 °C; Injection load: 2 μL; Solvent: MeOH; Concentration: 0.2 mg/mL; Run time: 15 min; Mobile phase A: water; Mobile phase B: MeOH; Gradient program: Mobile phase A/Mobile phase B = 20/80; tR = 2.101 min, purity: 99.07%.

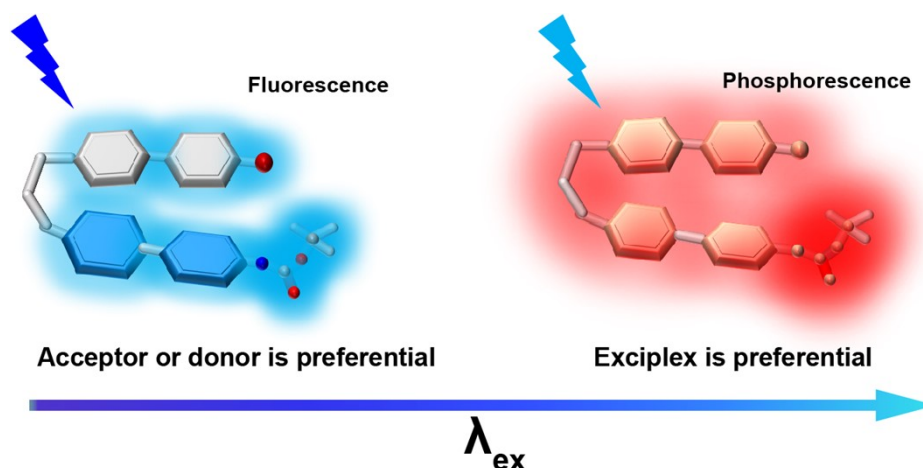

**Scheme S1.** Possible mechanism of excitation-dependent luminescence.

Coordinates of optimized Y1 molecule

|   |          |          |          |
|---|----------|----------|----------|
| C | -3.03144 | 0.64665  | 0.13415  |
| C | -4.20887 | -0.02608 | -0.11141 |
| C | -5.41062 | 0.38655  | 0.49706  |
| C | -5.33446 | 1.49899  | 1.35804  |
| C | -4.13288 | 2.13827  | 1.57472  |
| H | -2.0898  | 0.34953  | -0.30947 |
| H | -4.17446 | -0.89243 | -0.75989 |
| H | -6.21531 | 1.89236  | 1.84957  |
| H | -4.04263 | 2.99837  | 2.22605  |
| C | -6.68392 | -0.31269 | 0.24626  |
| C | -7.69159 | -0.34653 | 1.22745  |
| C | -6.91748 | -0.95825 | -0.98186 |

|    |           |          |          |
|----|-----------|----------|----------|
| C  | -8.89374  | -1.00787 | 0.99573  |
| H  | -7.53192  | 0.11651  | 2.1956   |
| C  | -8.12037  | -1.6127  | -1.22874 |
| H  | -6.1724   | -0.92615 | -1.77003 |
| C  | -9.0978   | -1.63334 | -0.23406 |
| H  | -9.65837  | -1.03918 | 1.76343  |
| H  | -8.29592  | -2.09481 | -2.18358 |
| C  | -1.72365  | 2.45068  | 1.17764  |
| H  | -1.74065  | 2.84255  | 2.19638  |
| H  | -0.91945  | 1.7156   | 1.1125   |
| C  | -1.55835  | 3.57543  | 0.14713  |
| H  | -2.39747  | 4.27453  | 0.22783  |
| H  | -1.58437  | 3.16217  | -0.86692 |
| C  | -0.28204  | 4.4019   | 0.34679  |
| H  | -0.28497  | 5.25085  | -0.33895 |
| H  | -0.21365  | 4.79576  | 1.36228  |
| C  | 1.73367   | 3.18993  | 1.11509  |
| C  | 1.34116   | 3.37755  | -1.19136 |
| C  | 2.88632   | 2.47323  | 0.88564  |
| H  | 1.39978   | 3.44259  | 2.11329  |
| C  | 2.48442   | 2.66546  | -1.47023 |
| H  | 0.69291   | 3.75981  | -1.9698  |
| C  | 3.30868   | 2.18018  | -0.42965 |
| H  | 3.47247   | 2.17132  | 1.74416  |
| H  | 2.71867   | 2.47256  | -2.50939 |
| C  | 4.53361   | 1.42406  | -0.69992 |
| C  | 5.22626   | 1.56474  | -1.92024 |
| C  | 5.06558   | 0.52856  | 0.24801  |
| C  | 6.38814   | 0.85629  | -2.16798 |
| H  | 4.87803   | 2.26356  | -2.67355 |
| C  | 6.22166   | -0.20009 | 0.00532  |
| H  | 4.55021   | 0.36174  | 1.18845  |
| C  | 6.90924   | -0.04226 | -1.21293 |
| H  | 6.91094   | 1.00034  | -3.10944 |
| H  | 6.58568   | -0.89039 | 0.75082  |
| N  | -2.99742  | 1.71549  | 0.96687  |
| N  | 0.96598   | 3.6346   | 0.08812  |
| Br | -10.74816 | -2.53423 | -0.5627  |
| N  | 8.08044   | -0.71501 | -1.5663  |
| H  | 8.43749   | -0.51142 | -2.49208 |
| H  | 7.82292   | -1.91854 | -1.07657 |

Coordinates of the excited state of Y1 molecule

|   |          |         |          |
|---|----------|---------|----------|
| C | -1.03545 | 2.95884 | -2.47812 |
|---|----------|---------|----------|

|   |          |         |          |
|---|----------|---------|----------|
| C | -1.00951 | 3.89629 | -3.48771 |
| C | -1.63807 | 5.14599 | -3.32144 |
| C | -2.28362 | 5.37259 | -2.09017 |
| C | -2.28306 | 4.40334 | -1.10989 |
| H | -0.5731  | 1.98504 | -2.57738 |
| H | -0.52032 | 3.6321  | -4.41681 |
| H | -2.77261 | 6.31469 | -1.87556 |
| H | -2.76445 | 4.54592 | -0.15074 |
| C | -1.62221 | 6.16487 | -4.38677 |
| C | -1.80186 | 5.79961 | -5.73323 |
| C | -1.42734 | 7.52304 | -4.07621 |
| C | -1.78187 | 6.75744 | -6.74257 |
| H | -1.9257  | 4.75707 | -6.00726 |
| C | -1.41857 | 8.49074 | -5.07607 |
| H | -1.3144  | 7.8398  | -3.04453 |
| C | -1.59328 | 8.09684 | -6.40261 |
| H | -1.90635 | 6.46451 | -7.77874 |
| H | -1.28256 | 9.53646 | -4.82516 |
| C | -1.63972 | 2.20169 | -0.21689 |
| H | -2.55824 | 2.3261  | 0.35965  |
| H | -1.67151 | 1.2214  | -0.69554 |
| C | -0.39566 | 2.37285 | 0.66399  |
| H | -0.28542 | 1.49924 | 1.31553  |
| H | -0.51768 | 3.24417 | 1.31668  |
| C | 0.90759  | 2.49359 | -0.1357  |
| H | 1.75678  | 2.49007 | 0.5503   |
| H | 1.03317  | 1.65512 | -0.82291 |
| C | 0.82008  | 3.71473 | -2.28822 |
| C | 1.25688  | 4.92213 | -0.32426 |
| C | 0.89006  | 4.86356 | -3.03916 |
| H | 0.63823  | 2.7451  | -2.73422 |
| C | 1.33683  | 6.09577 | -1.03214 |
| H | 1.39446  | 4.88527 | 0.74915  |
| C | 1.15233  | 6.11993 | -2.43814 |
| H | 0.76888  | 4.76699 | -4.1102  |
| H | 1.52536  | 7.0035  | -0.47388 |
| C | 1.23318  | 7.35059 | -3.2117  |
| C | 0.97013  | 8.61141 | -2.62514 |
| C | 1.57679  | 7.33936 | -4.58461 |
| C | 1.05044  | 9.78299 | -3.35212 |
| H | 0.72936  | 8.68302 | -1.56971 |
| C | 1.6467   | 8.50223 | -5.32656 |
| H | 1.75645  | 6.39855 | -5.09436 |
| C | 1.38848  | 9.75783 | -4.72633 |

|    |          |          |          |
|----|----------|----------|----------|
| H  | 0.85994  | 10.73602 | -2.86673 |
| H  | 1.89597  | 8.45636  | -6.38291 |
| N  | -1.66516 | 3.21315  | -1.30515 |
| N  | 0.99564  | 3.7386   | -0.94075 |
| Br | -1.57372 | 9.41813  | -7.7801  |
| N  | 1.50511  | 10.91558 | -5.44118 |
| H  | 1.0992   | 11.76231 | -5.06629 |
| H  | 1.52298  | 10.86575 | -6.45084 |

Coordinates of optimized Y2 molecule

|   |          |          |          |
|---|----------|----------|----------|
| C | -2.93597 | 0.85386  | -0.08305 |
| C | -4.12457 | 0.15119  | -0.33112 |
| C | -5.25488 | 0.42116  | 0.44261  |
| C | -5.16828 | 1.39117  | 1.44052  |
| C | -3.95605 | 2.0636   | 1.64363  |
| H | -2.06635 | 0.65036  | -0.67219 |
| H | -4.16398 | -0.58528 | -1.1062  |
| H | -6.02016 | 1.61977  | 2.04604  |
| H | -3.88579 | 2.80928  | 2.40722  |
| C | -6.57522 | -0.33611 | 0.20313  |
| C | -7.69704 | -0.05462 | 0.99529  |
| C | -6.6561  | -1.30618 | -0.80473 |
| C | -8.89901 | -0.74201 | 0.779    |
| H | -7.63573 | 0.68537  | 1.76584  |
| C | -7.85848 | -1.99406 | -1.02074 |
| H | -5.80016 | -1.52164 | -1.40953 |
| C | -8.97985 | -1.71119 | -0.22917 |
| H | -9.75504 | -0.52675 | 1.38382  |
| H | -7.91997 | -2.73502 | -1.79024 |
| C | -1.6232  | 2.50444  | 1.13365  |
| H | -1.56528 | 2.77609  | 2.16693  |
| H | -0.79312 | 1.87755  | 0.88268  |
| C | -1.58864 | 3.77554  | 0.26608  |
| H | -2.4267  | 4.39388  | 0.51011  |
| H | -1.63475 | 3.50229  | -0.76775 |
| C | -0.28704 | 4.55443  | 0.5357   |
| H | -0.27328 | 5.43835  | -0.06726 |
| H | -0.24409 | 4.82552  | 1.56981  |
| C | 1.43059  | 2.94132  | 1.14762  |
| C | 1.37439  | 3.75744  | -1.0466  |
| C | 2.56127  | 2.16188  | 0.86039  |
| H | 1.00497  | 2.91646  | 2.12927  |
| C | 2.50089  | 2.99791  | -1.39    |

|    |           |          |          |
|----|-----------|----------|----------|
| H  | 0.90518   | 4.37393  | -1.78495 |
| C  | 3.10974   | 2.19742  | -0.42295 |
| H  | 2.99939   | 1.54678  | 1.61829  |
| H  | 2.89167   | 3.03301  | -2.38556 |
| C  | 4.36522   | 1.3718   | -0.76745 |
| C  | 4.89504   | 1.41105  | -2.06436 |
| C  | 4.97971   | 0.58362  | 0.21529  |
| C  | 6.04171   | 0.6679   | -2.37721 |
| H  | 4.42471   | 2.00908  | -2.81583 |
| C  | 6.1284    | -0.15786 | -0.09714 |
| H  | 4.57316   | 0.54867  | 1.20462  |
| C  | 6.65963   | -0.11564 | -1.39331 |
| H  | 6.44571   | 0.69897  | -3.36754 |
| H  | 6.59994   | -0.75627 | 0.65439  |
| N  | -2.88015  | 1.78154  | 0.88861  |
| N  | 0.87779   | 3.72104  | 0.20143  |
| Br | -10.61932 | -2.646   | -0.52389 |
| N  | 7.86447   | -0.89371 | -1.72048 |
| H  | 7.83723   | -1.16105 | -2.68409 |
| C  | 7.91439   | -2.09866 | -0.87954 |
| O  | 6.89103   | -2.79925 | -1.09097 |
| C  | 9.17419   | -2.91471 | -1.22389 |
| C  | 10.4225   | -2.02987 | -1.04959 |
| H  | 11.29206  | -2.64952 | -0.98036 |
| H  | 10.51657  | -1.37601 | -1.89132 |
| H  | 10.3262   | -1.4493  | -0.15597 |
| C  | 9.27128   | -4.13037 | -0.2835  |
| H  | 8.49605   | -4.82836 | -0.52167 |
| H  | 10.22458  | -4.60066 | -0.4058  |
| H  | 9.16069   | -3.80673 | 0.73037  |
| C  | 9.08858   | -3.39993 | -2.68294 |
| H  | 9.15001   | -2.5596  | -3.34246 |
| H  | 9.89757   | -4.07083 | -2.88375 |
| H  | 8.15866   | -3.9065  | -2.83637 |

Coordinates of the excited state of Y2 molecule

|   |         |         |          |
|---|---------|---------|----------|
| C | 4.47966 | 1.25838 | 1.61403  |
| C | 3.11777 | 1.46389 | 1.56683  |
| C | 2.45498 | 1.59518 | 0.33062  |
| C | 3.2533  | 1.51286 | -0.82719 |
| C | 4.6128  | 1.30876 | -0.7297  |
| H | 5.02029 | 1.16316 | 2.54699  |
| H | 2.58296 | 1.54879 | 2.50439  |



|    |          |          |          |
|----|----------|----------|----------|
| H  | 2.81963  | 1.58343  | -1.81673 |
| H  | 5.25228  | 1.23574  | -1.60026 |
| C  | 0.9986   | 1.80992  | 0.25329  |
| C  | 0.2243   | 1.1482   | -0.71719 |
| C  | 0.35353  | 2.67981  | 1.15149  |
| C  | -1.15021 | 1.35032  | -0.79534 |
| H  | 0.69491  | 0.49326  | -1.443   |
| C  | -1.02201 | 2.88053  | 1.08991  |
| H  | 0.9175   | 3.18309  | 1.92997  |
| C  | -1.76155 | 2.21425  | 0.11302  |
| H  | -1.7356  | 0.84565  | -1.55536 |
| H  | -1.51136 | 3.54187  | 1.79571  |
| C  | 6.67418  | 0.91318  | 0.55636  |
| H  | 7.1425   | 1.41968  | -0.2897  |
| H  | 7.03395  | 1.3845   | 1.47273  |
| C  | 6.96011  | -0.59418 | 0.53546  |
| H  | 8.00436  | -0.77439 | 0.81195  |
| H  | 6.82644  | -0.98753 | -0.47803 |
| C  | 6.10324  | -1.39061 | 1.52712  |
| H  | 6.43656  | -2.4296  | 1.54637  |
| H  | 6.19032  | -0.99528 | 2.5406   |
| C  | 3.77352  | -0.62867 | 1.86493  |
| C  | 4.2137   | -2.1955  | 0.17369  |
| C  | 2.43378  | -0.62691 | 1.54871  |
| H  | 4.1768   | -0.03287 | 2.6737   |
| C  | 2.88452  | -2.22743 | -0.17866 |
| H  | 4.96133  | -2.793   | -0.33265 |
| C  | 1.93408  | -1.43406 | 0.50321  |
| H  | 1.77435  | -0.01238 | 2.1481   |
| H  | 2.59636  | -2.86279 | -1.00643 |
| C  | 0.51253  | -1.45374 | 0.15105  |
| C  | 0.08513  | -1.79703 | -1.14827 |
| C  | -0.48053 | -1.13075 | 1.09604  |
| C  | -1.25879 | -1.82399 | -1.47443 |
| H  | 0.80558  | -2.08432 | -1.90689 |
| C  | -1.83128 | -1.13851 | 0.77707  |
| H  | -0.19918 | -0.82826 | 2.09963  |
| C  | -2.24497 | -1.4934  | -0.52091 |
| H  | -1.55901 | -2.1117  | -2.47818 |
| H  | -2.55956 | -0.86597 | 1.52548  |
| N  | 5.21498  | 1.18163  | 0.47807  |
| N  | 4.65605  | -1.40152 | 1.18256  |
| Br | -3.64803 | 2.48901  | 0.01807  |
| N  | -3.57087 | -1.54147 | -0.95546 |

|   |          |          |          |
|---|----------|----------|----------|
| C | -4.79735 | -1.34349 | -0.33509 |
| O | -5.83121 | -1.46176 | -0.97501 |
| C | -5.41227 | -1.02288 | 0.88109  |
| C | -6.17892 | 0.18675  | 0.34218  |
| H | -5.51265 | 1.05121  | 0.25094  |
| H | -6.62263 | -0.02431 | -0.63191 |
| H | -6.97911 | 0.4468   | 1.04323  |
| C | -6.27003 | -2.2882  | 0.95077  |
| H | -5.66886 | -3.13921 | 1.28846  |
| H | -7.07846 | -2.13508 | 1.67358  |
| H | -6.70947 | -2.52613 | -0.01907 |
| C | -4.78891 | -0.71128 | 2.24268  |
| H | -4.19379 | -1.55745 | 2.60068  |
| H | -4.14428 | 0.17156  | 2.18261  |
| H | -5.57954 | -0.51193 | 2.97273  |
| H | -3.70166 | -1.78862 | -1.92901 |

Coordinates of optimized Y3 molecule

|   |           |          |          |
|---|-----------|----------|----------|
| C | -3.36243  | 0.52566  | -0.02422 |
| C | -4.58402  | -0.10329 | -0.13293 |
| C | -5.74425  | 0.48642  | 0.40655  |
| C | -5.58288  | 1.72906  | 1.04995  |
| C | -4.34017  | 2.31842  | 1.13552  |
| H | -2.45007  | 0.09407  | -0.41586 |
| H | -4.61686  | -1.072   | -0.61527 |
| H | -6.42807  | 2.2584   | 1.47153  |
| H | -4.18206  | 3.27296  | 1.62079  |
| C | -7.06252  | -0.16549 | 0.30693  |
| C | -8.03718  | 0.03139  | 1.30222  |
| C | -7.3729   | -0.99569 | -0.78551 |
| C | -9.28247  | -0.58344 | 1.21545  |
| H | -7.81865  | 0.64183  | 2.17238  |
| C | -8.61942  | -1.60558 | -0.88864 |
| H | -6.65323  | -1.14574 | -1.58368 |
| C | -9.56321  | -1.39476 | 0.11636  |
| H | -10.02164 | -0.43618 | 1.99441  |
| H | -8.85411  | -2.23151 | -1.74185 |
| C | -1.92457  | 2.39671  | 0.67445  |
| H | -1.90313  | 2.96896  | 1.60397  |
| H | -1.17093  | 1.6106   | 0.74565  |
| C | -1.70194  | 3.29976  | -0.54562 |
| H | -2.5012   | 4.04634  | -0.60063 |
| H | -1.75638  | 2.70681  | -1.4652  |

|    |           |          |          |
|----|-----------|----------|----------|
| C  | -0.38216  | 4.07813  | -0.49393 |
| H  | -0.33283  | 4.77405  | -1.33321 |
| H  | -0.29822  | 4.65804  | 0.42649  |
| C  | 1.59238   | 2.9848   | 0.51938  |
| C  | 1.14961   | 2.6264   | -1.75749 |
| C  | 2.70275   | 2.17159  | 0.45696  |
| H  | 1.29607   | 3.49036  | 1.42958  |
| C  | 2.24728   | 1.80467  | -1.86844 |
| H  | 0.50241   | 2.84291  | -2.59778 |
| C  | 3.07208   | 1.54432  | -0.75189 |
| H  | 3.29597   | 2.05625  | 1.35514  |
| H  | 2.44425   | 1.34994  | -2.83089 |
| C  | 4.25102   | 0.67558  | -0.84764 |
| C  | 4.92254   | 0.49497  | -2.07093 |
| C  | 4.74654   | -0.00965 | 0.28045  |
| C  | 6.04289   | -0.31997 | -2.16062 |
| H  | 4.60004   | 1.02886  | -2.95872 |
| C  | 5.85401   | -0.83895 | 0.19294  |
| H  | 4.23046   | 0.06176  | 1.23238  |
| C  | 6.53196   | -0.99693 | -1.02985 |
| H  | 6.55363   | -0.41326 | -3.11228 |
| H  | 6.18942   | -1.37911 | 1.06811  |
| N  | -3.24587  | 1.72103  | 0.60385  |
| N  | 0.82148   | 3.20566  | -0.57452 |
| Br | -11.27356 | -2.23196 | -0.01642 |
| N  | 7.63974   | -1.86737 | -1.16661 |
| C  | 8.71903   | -1.92833 | -0.2907  |
| O  | 9.66962   | -2.6719  | -0.48887 |
| O  | 8.58321   | -1.08046 | 0.7391   |
| C  | 9.62331   | -0.96172 | 1.78997  |
| C  | 9.78675   | -2.29743 | 2.51966  |
| H  | 8.82034   | -2.64546 | 2.90023  |
| H  | 10.2058   | -3.06106 | 1.86275  |
| H  | 10.45919  | -2.16161 | 3.37352  |
| C  | 10.93097  | -0.46383 | 1.16858  |
| H  | 10.75897  | 0.46329  | 0.61115  |
| H  | 11.65276  | -0.2526  | 1.96487  |
| H  | 11.35979  | -1.20815 | 0.49598  |
| C  | 9.02756   | 0.0968   | 2.72067  |
| H  | 8.8604    | 1.03588  | 2.18351  |
| H  | 8.07303   | -0.24255 | 3.13577  |
| H  | 9.71591   | 0.28956  | 3.54946  |
| H  | 7.73864   | -2.38654 | -2.01554 |

Coordinates of the excited state of Y3 molecule

|   |          |          |          |
|---|----------|----------|----------|
| C | -5.22321 | 7.90514  | 0.6347   |
| C | -4.97577 | 8.86624  | 1.59088  |
| C | -3.68071 | 9.03532  | 2.11905  |
| C | -2.67919 | 8.17589  | 1.62613  |
| C | -2.97533 | 7.22758  | 0.67094  |
| H | -6.20814 | 7.74314  | 0.21588  |
| H | -5.80886 | 9.46296  | 1.94037  |
| H | -1.65372 | 8.25317  | 1.96477  |
| H | -2.22728 | 6.55627  | 0.26858  |
| C | -3.38919 | 10.05967 | 3.13828  |
| C | -2.20761 | 10.82075 | 3.07605  |
| C | -4.28949 | 10.29826 | 4.19285  |
| C | -1.92736 | 11.78662 | 4.0377   |
| H | -1.479   | 10.64165 | 2.2923   |
| C | -4.02497 | 11.26958 | 5.15346  |
| H | -5.22312 | 9.74867  | 4.25336  |
| C | -2.8424  | 12.00398 | 5.06762  |
| H | -1.00778 | 12.35836 | 3.98788  |
| H | -4.73191 | 11.45543 | 5.95388  |
| C | -4.5174  | 6.10145  | -0.88262 |
| H | -3.85561 | 5.24978  | -0.71424 |
| H | -5.54494 | 5.76451  | -0.73441 |
| C | -4.30729 | 6.70759  | -2.27646 |
| H | -4.72706 | 6.03895  | -3.03547 |
| H | -3.23656 | 6.79824  | -2.48879 |
| C | -4.99788 | 8.06437  | -2.4612  |
| H | -4.9092  | 8.38129  | -3.50171 |
| H | -6.06091 | 8.00978  | -2.22033 |
| C | -5.04661 | 9.57706  | -0.50374 |
| C | -3.22955 | 9.70604  | -1.98382 |
| C | -4.50912 | 10.57154 | 0.28176  |
| H | -5.99673 | 9.11118  | -0.27584 |
| C | -2.65341 | 10.70248 | -1.2308  |
| H | -2.77105 | 9.32485  | -2.8876  |
| C | -3.27875 | 11.17712 | -0.05547 |
| H | -5.07594 | 10.89447 | 1.14559  |
| H | -1.69832 | 11.09414 | -1.5569  |
| C | -2.68885 | 12.24047 | 0.76093  |
| C | -1.29765 | 12.47132 | 0.76798  |
| C | -3.48812 | 13.07194 | 1.56921  |
| C | -0.74522 | 13.48283 | 1.53278  |
| H | -0.63838 | 11.88064 | 0.14065  |

|    |          |          |          |
|----|----------|----------|----------|
| C  | -2.94455 | 14.07988 | 2.35338  |
| H  | -4.5602  | 12.91176 | 1.62239  |
| C  | -1.55518 | 14.30656 | 2.34302  |
| H  | 0.32791  | 13.64979 | 1.50256  |
| H  | -3.59021 | 14.68264 | 2.97354  |
| N  | -4.23299 | 7.09793  | 0.18207  |
| N  | -4.41236 | 9.14505  | -1.62306 |
| Br | -2.46933 | 13.33395 | 6.38492  |
| N  | -0.89712 | 15.29031 | 3.08352  |
| C  | -1.32083 | 16.30233 | 3.93475  |
| O  | -0.50216 | 17.04457 | 4.45554  |
| O  | -2.6474  | 16.33688 | 4.08306  |
| C  | -3.30588 | 17.34806 | 4.95484  |
| C  | -2.84188 | 17.16137 | 6.40094  |
| H  | -3.00475 | 16.1275  | 6.72362  |
| H  | -1.78506 | 17.40702 | 6.51525  |
| H  | -3.42716 | 17.81748 | 7.05392  |
| C  | -3.02559 | 18.75284 | 4.41662  |
| H  | -3.32235 | 18.82526 | 3.36479  |
| H  | -3.61364 | 19.48008 | 4.98649  |
| H  | -1.96937 | 19.01102 | 4.50641  |
| C  | -4.78628 | 16.99296 | 4.80677  |
| H  | -5.10252 | 17.07222 | 3.76175  |
| H  | -4.97865 | 15.97336 | 5.15597  |
| H  | -5.39178 | 17.68195 | 5.40383  |
| H  | 0.1111   | 15.30654 | 2.98752  |

## References

1. Ma, X. K.; Zhou, X.; Wu, J.; Shen, F. F.; Liu, Y. Two-Photon Excited Near-Infrared Phosphorescence Based on Secondary Supramolecular Confinement. *Adv Sci* . **2022**, *9*, e2201182.
